# Supplementary material
Source: HighWire-hosted journal article supplement (https://www.annfammed.org/highwire/filestream/8290/field_highwire_adjunct_files/5/Shaw_Supp_Table_1.pdf)
Supplement: Shaw_Supp_Table_1.pdf [file Shaw_Supp_Table_1.pdf]

**Online Supplementary Material**

Shaw EK, Ohman-Strickland PA, Piasecki A, et al. Effects of facilitated team meetings and learning collaboratives on colorectal cancer screening rates in primary care practices: a cluster randomized trial. *Ann Fam Med*. 2013;11(3):220-228.

<http://www.annfammed.org/content/11/3/220>

**Supplemental Table 1. Details of RAP Teams and Learning Collaboratives (Intervention Practices)**

| Practice ID | Total No. of Physicians and Staff | Size of RAP Team | No. of RAP Meetings | Attended 1st LC               | Attended 2nd LC                       | QI Objectives/Plans                                                                                                                                           |
|-------------|-----------------------------------|------------------|---------------------|-------------------------------|---------------------------------------|---------------------------------------------------------------------------------------------------------------------------------------------------------------|
| P2          | 7                                 | 4                | 7                   | Physician, front office staff | Physician, front office staff         | Improve documentation and communication with specialists; implement a new history-taking and chart review process                                             |
| P7          | 20                                | 6                | 11                  | Physician, office manager     | Physician, office manager             | Improve practice communication and morale; implement new IT; decrease chart clutter in office                                                                 |
| P8          | 24                                | 4                | 9                   | Physician, nurse              | Physician, physician's assistant      | Standardize work across physicians; improve patient and staff education on CRC/screening                                                                      |
| P10         | 20                                | 6                | 8                   | Office manager, nurse         | Office manager, physician's assistant | Address practice 'chaos'; improve practice communication and working relationships; implement flow sheet and referral sheet; improve workflow at front office |
| P11         | 9                                 | 4                | 12                  | Office manager                | Physician, office manager             | Improve communication in practice; improve time management and patient flow                                                                                   |
| P15         | 11                                | 4                | 4                   | Physician, office manager     | Physician, office manager             | Improve communication in practice; improve documentation & coding for CRC screening                                                                           |
| P16         | 66                                | 9                | 9                   | Physician, nurse              | Physician (resident), nurse (2)       | Improve patient & clinicians' CRC education/awareness                                                                                                         |
| P17         | 15                                | –                | 0                   | –                             | –                                     | –                                                                                                                                                             |

**Online Supplementary Data**

<http://www.annfammed.org/content/11/3/220/DC1>

| <b>Practice ID</b>                                                                                                                                                              | <b>Total No. of Physicians and Staff</b> | <b>Size of RAP Team</b> | <b>No. of RAP Meetings</b> | <b>Attended 1st LC</b>                              | <b>Attended 2nd LC</b>                     | <b>QI Objectives/Plans</b>                                                                         |
|---------------------------------------------------------------------------------------------------------------------------------------------------------------------------------|------------------------------------------|-------------------------|----------------------------|-----------------------------------------------------|--------------------------------------------|----------------------------------------------------------------------------------------------------|
| P19                                                                                                                                                                             | 5                                        | 5                       | 10                         | Physician, office manager, nurse                    | Physician, office manager, nurse           | Improve CRC documentation through EHR use and develop CRC screening protocols                      |
| P21                                                                                                                                                                             | 23                                       | –                       | 0                          | –                                                   | –                                          | –                                                                                                  |
| P22                                                                                                                                                                             | 14                                       | 6                       | 5                          | Office manager/nurse, nurse (2)                     | Office manager/nurse, nurse (4), physician | Improve CRC screening documentation and chart organization; improve CRC education/awareness        |
| P23                                                                                                                                                                             | 12                                       | 5                       | 9                          | Office manager/nurse, nurse, front office staff (2) | Physician, nurse                           | Patient and staff CRC education; improve patient CRC screening compliance via education/counseling |
| CRC = colorectal cancer; HER = electronic health record; IT = information technology; LC = learning collaborative; QI = quality improvement; RAP = reflective adaptive process. |                                          |                         |                            |                                                     |                                            |                                                                                                    |
